# Supplementary material for: A Pharmacovigilance Analysis of Daptomycin Use Based on CLSI Susceptible Dose-Dependent Category
Source: Springer Nature journal article supplement (doi:10.1007/s40121-023-00868-0), 2023-09-01
Supplement: MOESM1 [file 26090166]

**A Pharmacovigilance Analysis of Daptomycin Use Based on CLSI Susceptible Dose-Dependent Category – Supplementary Material**

Ming M. Zhang,<sup>a</sup> Ryan W. Stevens,<sup>a</sup> Jennifer L. Adema,<sup>b</sup> Kristin C. Mara,<sup>c</sup> Audrey N. Schuetz,<sup>d</sup> Aaron J. Tande,<sup>e</sup> Christina G. Rivera<sup>a</sup>

<sup>a</sup>Department of Pharmacy, Mayo Clinic, 200 First St. SW Rochester, Minnesota 55905, USA

<sup>b</sup>Department of Pharmacy, East Carolina University Health Medical Center, 2100 Stantonsburg Rd. Greenville, North Carolina 27834, USA

<sup>c</sup>Department of Quantitative Health Sciences, Mayo Clinic, 200 First St. SW Rochester, Minnesota 55905, USA

<sup>d</sup>Laboratory Medicine and Pathology, Mayo Clinic, 200 First St. SW Rochester, Minnesota 55905, USA

<sup>e</sup>Division of Public Health, Infectious Diseases, and Occupational Medicine, Mayo Clinic, 200 First St. SW Rochester, Minnesota 55905, USA

#Address correspondence to Christina G. Rivera, [rivera.christina@mayo.edu](mailto:rivera.christina@mayo.edu) , 200 First St. SW Rochester, Minnesota 55905, USA

Supplemental Figure 1. Time to Event Curves for Primary Composite Outcome, Elevated Liver Function Tests, and Peripheral Eosinophilia

- Abbreviations: LFT: liver function test

Supplemental Table 1. Clinical and Laboratory Standards Institute Guidance for Daptomycin Breakpoints for *Enterococcus* Species

| CLSI Guidance | Dates During Which Institution Reported CLSI Guidance | Organism Group                               | Minimal inhibitory concentration (mg/L) |                            |              |           |
|---------------|-------------------------------------------------------|----------------------------------------------|-----------------------------------------|----------------------------|--------------|-----------|
|               |                                                       |                                              | Susceptible                             | Susceptible Dose-Dependent | Intermediate | Resistant |
| 2018          | Prior to Sept 2018                                    | <i>Enterococcus</i> spp.                     | ≤4                                      | -                          | -            | -         |
| 2019          | Sept 2018 <sup>a</sup> – Sept 2020                    | <i>Enterococcus</i> spp.                     | ≤1                                      | 2-4                        | -            | ≥8        |
| 2020          | Sept 2020 – Present                                   | <i>Enterococcus faecium</i> only             | -                                       | ≤4                         | -            | ≥8        |
|               |                                                       | Non- <i>faecium</i> <i>Enterococcus</i> spp. | ≤2                                      | -                          | 4            | ≥8        |

- a. CLSI 2019 recommendations were implemented prior to formal release of the CLSI M100 2019 document, based on meeting minutes from the CLSI annual meeting
- Abbreviations: CLSI: Clinical and Laboratory Standards Institute; Sept: September; spp: species

Supplemental Table 2. Breakdown of Antihistaminergic Agents in Patients with Concomitant Antihistamine Usage

| <b>Antihistaminergic medication</b> | <b>Number of patients taking medication</b> |
|-------------------------------------|---------------------------------------------|
| Cetirizine                          | 2                                           |
| Diphenhydramine                     | 5                                           |
| Doxepin                             | 1                                           |
| Hydroxyzine                         | 4                                           |
| Loratadine                          | 2                                           |
| Meclizine                           | 1                                           |
| Mirtazapine                         | 8                                           |

Supplemental Table 3. Concomitant Antimicrobials During Infectious Course

|                                | <b>Standard-dose (N=76)</b> | <b>High-dose (N=43)</b> | <b>Total (N=119)</b> | <b>p value</b> |
|--------------------------------|-----------------------------|-------------------------|----------------------|----------------|
| Ampicillin, n (%)              | 1 (1.3%)                    | 2 (4.7%)                | 3 (2.5%)             | 0.26           |
| Piperacillin-tazobactam, n (%) | 32 (42.1%)                  | 21 (48.8%)              | 53 (44.5%)           | 0.48           |
| Cefazolin, n (%)               | 3 (3.9%)                    | 1 (2.3%)                | 4 (3.4%)             | 0.64           |
| Ceftriaxone, n (%)             | 16 (21.1%)                  | 5 (11.6%)               | 21 (17.6%)           | 0.20           |
| Cefepime, n (%)                | 23 (30.3%)                  | 15 (34.9%)              | 38 (31.9%)           | 0.60           |
| Ceftazidime-avibactam, n (%)   | 3 (3.9%)                    | 0 (0.0%)                | 3 (2.5%)             | 0.19           |
| Ceftolozane-tazobactam, n (%)  | 2 (2.6%)                    | 0 (0.0%)                | 2 (1.7%)             | 0.28           |
| Ertapenem, n (%)               | 20 (26.3%)                  | 13 (30.2%)              | 33 (27.7%)           | 0.65           |
| Meropenem, n (%)               | 16 (21.1%)                  | 9 (20.9%)               | 25 (21.0%)           | 0.99           |
| Ciprofloxacin, n (%)           | 6 (7.9%)                    | 2 (4.7%)                | 8 (6.7%)             | 0.50           |
| Levofloxacin, n (%)            | 5 (6.6%)                    | 0 (0.0%)                | 5 (4.2%)             | 0.086          |
| Vancomycin, n (%)              | 52 (68.4%)                  | 22 (51.2%)              | 74 (62.2%)           | 0.062          |
| Linezolid, n (%)               | 8 (10.5%)                   | 5 (11.6%)               | 13 (10.9%)           | 0.85           |
| Gentamicin, (%)                | 0 (0.0%)                    | 2 (4.7%)                | 2 (1.7%)             | 0.058          |
| Metronidazole, n (%)           | 24 (31.6%)                  | 14 (32.6%)              | 38 (31.9%)           | 0.91           |
| Other antibiotic, n (%)        | 8 (10.5%)                   | 3 (7.0%)                | 11 (9.2%)            | 0.52           |
